# Supplementary material for: In Vitro and In Vivo Assessments of Two Newly Isolated Bacteriophages against an ST13 Urinary Tract Infection Klebsiella pneumoniae
Source: MDPI journal article supplement (doi:10.3390/v14051079), 2022-05-17
Supplement: s1 [file s1]

**Table S1.** Host range and efficiency of plating (EOP) of vB\_KpnA\_K3-ULINTkp1 and vB\_KpnA\_K3-ULINTkp2 and the characteristics of the *Klebsiella* (a) and *E. coli* UPEC (b) strains used.

(a)

| N° | Identification of the strains of <i>Klebsiella</i> |            |    |          |           |      |        |                    | Host range & EOP     |                      |
|----|----------------------------------------------------|------------|----|----------|-----------|------|--------|--------------------|----------------------|----------------------|
|    | Species                                            | wzi allele | K  | K_ locus | O_ locus  | ST   | CG/ SL | Strain             | vB_KpnA_K3 -ULINTkp1 | vB_KpnA_K3 -ULINTkp2 |
| 1  | <i>K. pneumoniae</i>                               |            | 1  |          |           | 23   |        | SB4385             | x                    | x                    |
| 2  | <i>K. pneumoniae</i>                               | wzi-14     | 14 |          |           |      |        | QAMH 121231/0018   | x                    | x                    |
| 3  | <i>K. pneumoniae</i>                               | wzi-27     | 27 |          |           |      |        | SHIME 2.1          | x                    | x                    |
| 4  | <i>K. pneumoniae</i>                               | wzi-84     | 28 |          |           |      |        | QAMH 121014/0096   | x                    | x                    |
| 5  | <i>K. pneumoniae</i>                               | wzi-85     | 30 |          |           |      |        | ATCC 27736         | x                    | NP                   |
| 6  | <i>K. pneumoniae</i>                               | wzi-37     | 37 | KL50     | O1v1      | 35   | 11     | SB5908             | x                    | x                    |
| 7  | <i>K. pneumoniae</i>                               | wzi-59     | 3  | KL107    | OL3/ OL3a | 490  | 8      | SB5904             | 0,0072               | 0,0455               |
| 8  | <i>K. pneumoniae</i>                               | wzi-81     | 81 |          |           |      |        | QAMH 130528/0682   | x                    | 0,0001               |
| 9  | <i>K. pneumoniae</i>                               | wzi-101    | 24 | KL107    | OL2v1     | 2444 | 9      | SB5906             | x                    | x                    |
| 10 | <i>K. pneumoniae</i>                               | wzi-141    |    | KL107    | OL5       | 494  | 7      | SB5902             | x                    | x                    |
| 11 | <i>K. pneumoniae</i>                               | wzi-141    |    | KL107    | OL5       | 17   | 3      | SB5890             | x                    | 0,0009               |
| 12 | <i>K. pneumoniae</i>                               | wzi-141    |    | KL107    | OL5       | 17   | 15     | SB6038             | x                    | x                    |
| 13 | <i>K. pneumoniae</i>                               | wzi-149    | 62 | KL107    | OL2v1     | 2552 | 10     | SB5907             | x                    | x                    |
| 14 | <i>K. pneumoniae</i>                               | wzi-235    |    | KL107    | OL1v1     | 107  | 14     | SB6037             | x                    | x                    |
| 15 | <i>K. pneumoniae</i>                               | wzi-253    |    | KL107    | OL1v2     | 3137 | 1      | SB5885             | x                    | x                    |
| 16 | <i>K. pneumoniae</i>                               | wzi-368    |    | KL107    | OL3/ OL3a | 1426 | 16     | SB6043             | x                    | x                    |
| 17 | <i>K. pneumoniae</i>                               | wzi-466    |    | KL107    | OL3/ OL3a | 3138 | 4      | SB5891             | x                    | x                    |
| 18 | <i>K. pneumoniae</i>                               |            |    | KL35     | OL1v1     | 305  | 12     | SB6070             | x                    | x                    |
| 19 | <i>K. pneumoniae</i>                               |            |    | KL107    | OL3/ OL3a | 3139 | 13     | SB6036             | x                    | x                    |
| 20 | <i>K. pneumoniae</i>                               |            |    |          |           |      |        | QAMH 110628/0752   | x                    | x                    |
| 21 | <i>K. pneumoniae</i>                               |            |    |          |           |      |        | QAMH 080708/0488-2 | x                    | x                    |
| 22 | <i>K. pneumoniae</i>                               |            |    |          |           |      |        | NCTC 13438         | x                    | x                    |
| 23 | <i>K. pneumoniae</i>                               |            |    | KL5      | OL1v1     | 29   | 18     | SB6063             | x                    | x                    |
| 24 | <i>K. pneumoniae</i>                               |            |    | KL106    |           | 258  |        | SB4551             | x                    | x                    |
| 25 | <i>K. oxytoca</i>                                  |            |    |          |           |      |        | QAMH 110607/1254   | x                    | x                    |

|    |                            |         |    |       |              |      |    |                     |    |        |
|----|----------------------------|---------|----|-------|--------------|------|----|---------------------|----|--------|
| 26 | <i>K. oxytoca</i>          |         |    |       |              |      |    | QAMH<br>121209/0028 | NP | 0,0007 |
| 27 | <i>K. oxytoca</i>          |         |    |       |              |      |    | QAMH<br>121120/0608 | x  | x      |
| 28 | <i>K. variicola</i>        | wzi-170 |    | KL5   | OL3/<br>OL3a | 2594 | 6  | SB5901              | x  | x      |
| 29 | <i>K. variicola</i>        | wzi-352 |    | KL113 | OL3/<br>OL3a | 347  | 5  | SB5897              | x  | x      |
| 30 | <i>K. variicola</i>        | wzi-115 | 54 | KL113 | OL1v1        | 29   | 18 | SB6060              | x  | x      |
| 31 | <i>K. quasi-pneumoniae</i> | wzi-537 |    | KL107 | OL12         | 705  | 2  | SB5886              | x  | x      |

(b)

| Identification of the strains |                |                  |                  |       |          |        | Host range              |                         |
|-------------------------------|----------------|------------------|------------------|-------|----------|--------|-------------------------|-------------------------|
| N°                            | Species        | <i>neuC</i> (K1) | <i>kfiB</i> (K5) | TEM   | CTX-M    | Strain | vB_KpnA_K3-<br>ULINTkp1 | vB_KpnA_K3-<br>ULINTkp2 |
| 1                             | <i>E. coli</i> |                  |                  |       | CTX-M 1  | 15     | x                       | x                       |
| 2                             | <i>E. coli</i> |                  |                  |       | CTX-M 15 | 142.1  | x                       | x                       |
| 3                             | <i>E. coli</i> | <i>neuC</i> +    |                  |       | CTX-M 15 | 143.1  | x                       | x                       |
| 4                             | <i>E. coli</i> |                  |                  |       | CTX-M 1  | 144.1  | x                       | x                       |
| 5                             | <i>E. coli</i> |                  |                  |       | CTX-M 1  | 144.2  | x                       | x                       |
| 6                             | <i>E. coli</i> |                  | <i>kfiB</i> +    | TEM 1 | CTX-M 1  | 151.1  | x                       | x                       |
| 7                             | <i>E. coli</i> |                  |                  |       | CTX-M 1  | 154.2  | x                       | x                       |
| 8                             | <i>E. coli</i> |                  |                  |       |          | J96    | x                       | x                       |

*K. pneumoniae*: *Klebsiella pneumoniae*; *K. oxytoca*: *Klebsiella oxytoca*; *K. variicola*: *Klebsiella variicola*; *K. quasipneumoniae*: *Klebsiella quasipneumoniae*; ST: sequence type; CG/SL: clonal group/sublineages; K: capsular type; K\_locus: K antigen and O\_locus: O antigen ; *E. coli*: *Escherichia coli*

**Table S2.** Phenotypic antibiotic susceptibility profile of the strain *Klebsiella pneumoniae* QAMH130326/0185.

| Method         | Antibiotics                     | Results (in mm) | Interpretation |
|----------------|---------------------------------|-----------------|----------------|
| Disk diffusion | Amoxicilin + clavulanic acid    | 17              | <b>R</b>       |
|                | Ampicilin                       | 6               | <b>R</b>       |
|                | Aztreonam                       | 34              | S              |
|                | Cefotaxim                       | 31              | S              |
|                | Cefotaxim + clavulanic acid     | 32              | Not a ESBL     |
|                | Cefoxitin                       | 25              | S              |
|                | Cefuroxim                       | 16              | <b>R</b>       |
|                | Fosfomicine                     | 16              | <b>R</b>       |
|                | Gentamycine                     | 24              | S              |
|                | Meropenem                       | 31              | S              |
|                | Nitrofurantoin                  | 19              | S              |
|                | Norflaxacin                     | 39              | S              |
|                | Temocilin                       | 21              | <b>I</b>       |
|                | Trimethoprim + sulfamethoxazole | 26              | S              |
|                | Ceftiofur                       | 28              | S              |
|                | Cefquinon                       | 21              | <b>I</b>       |
| MIC            | Colistin                        | 0,5             | S              |

References EUCAST 2021 for: amoxicilin + clavulanic acid, ampicilin, aztreonam, cefotaxime, cefotaxime + clavulanique acid, cefoxitin, cefuroxim, fosfomicine, gentamycine, meropenem, nitrofurantoin, norflaxacin, temocilin, trimethoprim + sulfamethoxazole, and colistin. References CASFM VET 2019 for: ceftiofur and cefquinon. S: susceptible to the antibiotic; R: resistant to the antibiotic; I: susceptible at higher dosage to the antibiotic; MIC: minimal inhibitory concentration.

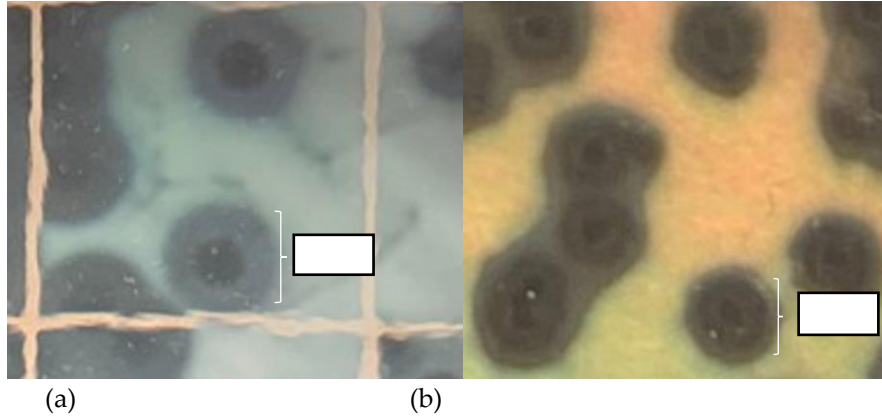

**Figure S1.** Pictures of the plaques of lysis of the bacteriophages **(a)** vB\_KpnA\_K3-ULINTkp1 and **(b)** vB\_KpnA\_K3-ULINTkp2.

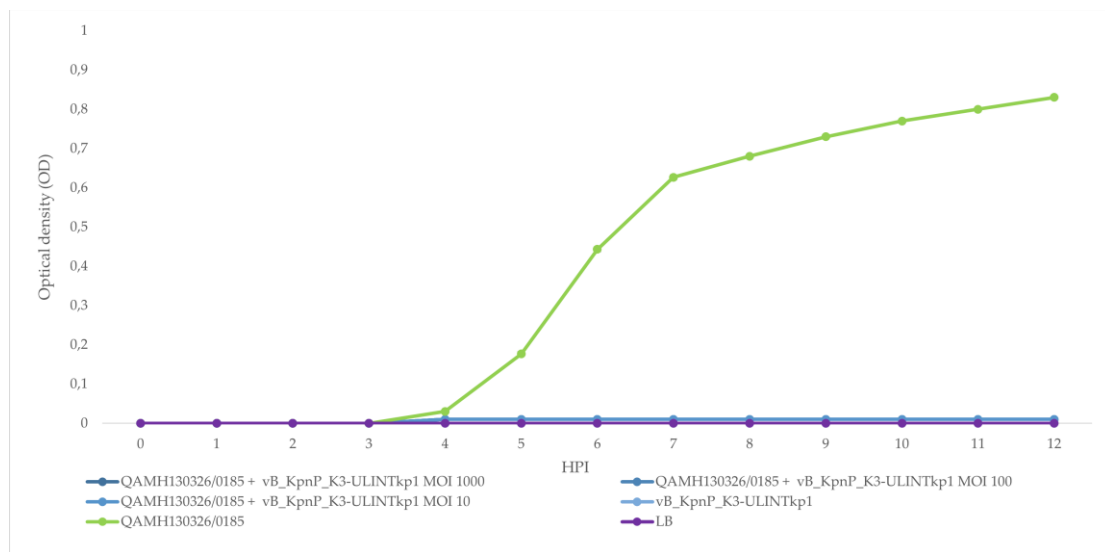

**(a)**

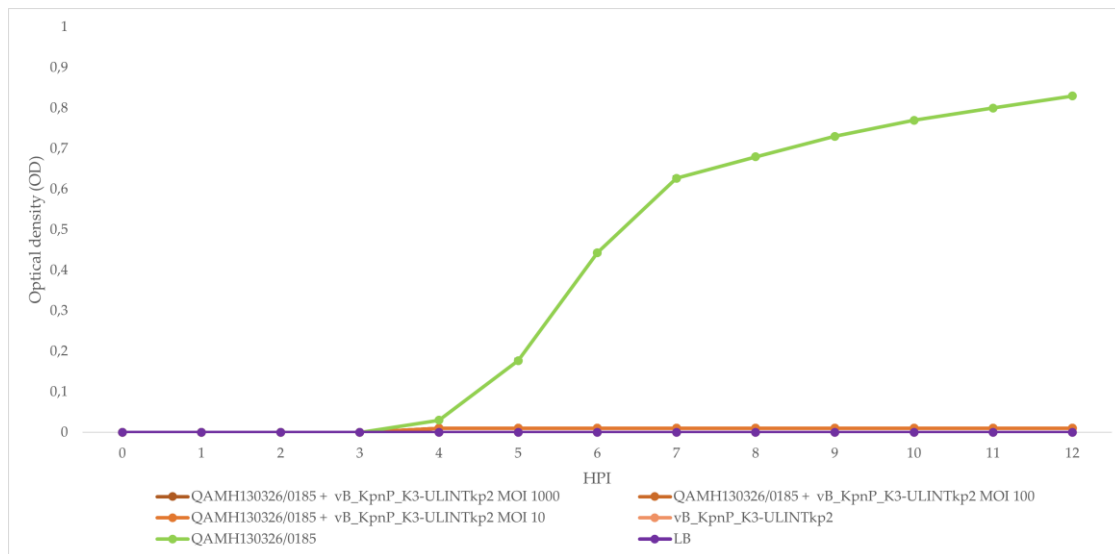

**(b)**

**Figure S2.** In vitro assessment, in biological triplicate, of the efficacy of the bacteriophages vB\_KpnA\_K3-ULINTkp1 **(a)** and vB\_KpnA\_K3-ULINTkp2 **(b)** against *K. pneumoniae* 130326/0185 with the measure of the optical density, OD (600nm). HPI: hours post inoculation.
